# Supplementary material
Source: PubMed Central journal article supplement (PMC4249317)
Supplement: IAI.01817-14_zii999090919so1.pdf [file IAI.01817-14_zii999090919so1.pdf]

1 **SUPPLEMENTAL INFORMATION TABLES**

2

3

4 **Table S1.** Infectivity of *in vitro*-grown wtB31 mutants in naïve SCID and C3H mice.

5

| Tissue collected<br>(at day post<br>infection) | Naïve SCID mice<br>inoculated with: |                         | Naïve C3H mice<br>inoculated with: |                         |
|------------------------------------------------|-------------------------------------|-------------------------|------------------------------------|-------------------------|
|                                                | wtB31-kan <sup>r</sup>              | wtB31-gent <sup>r</sup> | wtB31-kan <sup>r</sup>             | wtB31-gent <sup>r</sup> |
| Blood (day 7)                                  | 4/4 <sup>a</sup>                    | 4/4                     | 5/5                                | 5/5                     |
| Ear (day 14)                                   | 4/4                                 | 4/4                     | 5/5                                | 5/5                     |
| Ear (day 21)                                   | 4/4                                 | 4/4                     | 5/5                                | 5/5                     |
| <b>Tissues (day 28)</b>                        |                                     |                         |                                    |                         |
| Ear                                            | 4/4                                 | 4/4                     | 5/5                                | 5/5                     |
| Heart                                          | 4/4                                 | 4/4                     | 4/5                                | 5/5                     |
| Bladder                                        | 4/4                                 | 4/4                     | 5/5                                | 4/5                     |
| Joint                                          | 4/4                                 | 4/4                     | 5/5                                | 5/5                     |
| Total infected<br>mice (day 28) <sup>b</sup>   | 4/4                                 | 4/4                     | 5/5                                | 5/5                     |

6 <sup>a</sup> Values listed correspond to numbers of cultures positive/numbers tested.

7 <sup>b</sup> Based on combined results obtained from culturing ear, heart, bladder and tibiotarsal joint.

8

9

10 **Table S2.** Infectivity of host-adapted wtB31 mutants in naïve C3H and nude mice.

11

| Tissue collected<br>(at day post<br>infection) | Naïve C3H mice infected via<br>tissue transplantation with: |                                | Naïve nude mice infected via<br>tissue transplantation with: |                            |
|------------------------------------------------|-------------------------------------------------------------|--------------------------------|--------------------------------------------------------------|----------------------------|
|                                                | ha <sup>a</sup> wtB31-<br>kan <sup>r</sup>                  | ha wtB31-<br>gent <sup>r</sup> | ha wtB31-kan <sup>r</sup>                                    | ha wtB31-gent <sup>r</sup> |
| Blood (day 7)                                  | 5/5 <sup>b</sup>                                            | 5/5                            | 5/5                                                          | 5/5                        |
| Ear (day 14)                                   | 5/5                                                         | 5/5                            | 5/5                                                          | 5/5                        |
| Ear (day 21)                                   | 5/5                                                         | 5/5                            | 5/5                                                          | 5/5                        |
| <b>Tissues (day 28)</b>                        |                                                             |                                |                                                              |                            |
| Ear                                            | 5/5                                                         | 5/5                            | 5/5                                                          | 5/5                        |
| Heart                                          | 5/5                                                         | 5/5                            | NA <sup>c</sup>                                              | NA                         |
| Bladder                                        | 3/5                                                         | 3/5                            | NA                                                           | NA                         |
| Joint                                          | 5/5                                                         | 5/5                            | NA                                                           | NA                         |
| Total infected<br>mice (day 28) <sup>d</sup>   | 5/5                                                         | 5/5                            | 5/5                                                          | 5/5                        |

12 <sup>a</sup> ha denotes host-adapted clone.

13 <sup>b</sup> Values listed correspond to numbers of cultures positive/numbers tested.

14 <sup>c</sup> NA denotes non-assessed.

15 <sup>d</sup> Based on combined results obtained from culturing ear, heart, bladder and tibiotarsal joint.

16

17 **Table S3.** Assessment of superinfection in C3H mice using *in-vitro* grown *Bb* clones.

18

| Tissue collected<br>(at day post<br>challenge) | wtB31gent <sup>r</sup> - infected C3H mice<br>superinfected via inoculation with: | Control group (naïve C3H mice)<br>infected via inoculation with: |
|------------------------------------------------|-----------------------------------------------------------------------------------|------------------------------------------------------------------|
|                                                | wtB31-kan <sup>r</sup>                                                            | wtB31-kan <sup>r</sup>                                           |
| Blood (day 7)                                  | 0/5 <sup>a</sup>                                                                  | 5/5                                                              |
| Ear (day 14)                                   | 0/5                                                                               | 5/5                                                              |
| Ear (day 21)                                   | 0/5                                                                               | 5/5                                                              |
| <b>Tissues (day 28)</b>                        |                                                                                   |                                                                  |
| Ear                                            | 0/5                                                                               | 5/5                                                              |
| Heart                                          | 0/5                                                                               | 5/5                                                              |
| Bladder                                        | 0/5                                                                               | 4/5                                                              |
| Joint                                          | 0/5                                                                               | 5/5                                                              |
| Total infected<br>mice (day 28) <sup>b</sup>   | 0/5                                                                               | 5/5                                                              |

19 <sup>a</sup> Values listed correspond to numbers of cultures positive/numbers tested.

20 <sup>b</sup> Based on combined results obtained from culturing ear, heart, bladder and tibiotarsal joint.

21

22 **Table S4.** Assessment of early-time point superinfection in C3H mice.

| Tissue collected<br>(at day post<br>superinfection) | ha <sup>a</sup> wtB31-gent <sup>r</sup> -infected C3H mice superinfected with ha wtB31-<br>kan <sup>r</sup> via tissue transplantation: |                          |
|-----------------------------------------------------|-----------------------------------------------------------------------------------------------------------------------------------------|--------------------------|
|                                                     | at day 6 post infection                                                                                                                 | at day 13 post infection |
| Blood (day 4)                                       | 0/5 <sup>b</sup>                                                                                                                        | 0/5                      |
| Blood (day 7)                                       | 0/5                                                                                                                                     | 0/5                      |
| Ear (day 14)                                        | 0/5                                                                                                                                     | 0/5                      |
| Ear (day 21)                                        | 0/5                                                                                                                                     | 0/5                      |
| <b>Tissues (day 28)</b>                             |                                                                                                                                         |                          |
| Ear                                                 | 0/5                                                                                                                                     | 0/5                      |
| Heart                                               | 0/5                                                                                                                                     | 0/5                      |
| Bladder                                             | 0/5                                                                                                                                     | 0/5                      |
| Joint                                               | 0/5                                                                                                                                     | 0/5                      |
| Total infected mice<br>(day 28) <sup>c</sup>        | 0/5                                                                                                                                     | 0/5                      |

23 <sup>a</sup> ha denotes host-adapted clone.

24 <sup>b</sup> Values listed correspond to numbers of cultures positive/numbers tested.

25 <sup>c</sup> Based on combined results obtained from culturing ear, heart, bladder and tibiotarsal joint.

26

27 **Table S5.** Infectivity of host-adapted wtB31-gent<sup>r</sup> in naïve SCID mice.

| Tissue collected<br>(at day post<br>infection) | Naïve SCID mice infected via tissue<br>transplantation with ha <sup>a</sup> wtB31-gent <sup>r</sup> : |
|------------------------------------------------|-------------------------------------------------------------------------------------------------------|
| Blood (day 7)                                  | 5/5 <sup>b</sup>                                                                                      |
| Blood (day 14)                                 | 5/5                                                                                                   |
| Blood (day 21)                                 | 5/5                                                                                                   |
| Ear (day 21)                                   | 5/5                                                                                                   |

28 <sup>a</sup> ha denotes host-adapted clone.

29 <sup>b</sup> Values listed correspond to numbers of cultures positive/numbers tested.

30 **Table S6.** Assessment of superinfection by homologous strains of *B. burgdorferi* in nude and  
 31 SCID mice.

| Tissue collected<br>(at day post challenge)  | ha <sup>a</sup> wtB31-gent <sup>r</sup> -<br>infected nude mice | ha wtB31-gent <sup>r</sup> - infected SCID mice |                           |
|----------------------------------------------|-----------------------------------------------------------------|-------------------------------------------------|---------------------------|
|                                              | superinfected via tissue transplantation<br>with:               | superinfected via<br>inoculation with:          |                           |
|                                              |                                                                 | ha wtB31-kan <sup>r</sup>                       | ha wtB31-kan <sup>r</sup> |
| Blood (day 7)                                | 0/5 <sup>b</sup>                                                | 0/5                                             | 0/3                       |
| Ear (day 14)                                 | 0/5                                                             | 0/5                                             | 0/3                       |
| Ear (day 21)                                 | 0/5                                                             | 0/5                                             | 0/3                       |
| <b>Tissues (day 28)</b>                      |                                                                 |                                                 |                           |
| Ear                                          | 0/5                                                             | 0/5                                             | 0/3                       |
| Heart                                        | 0/5                                                             | 0/5                                             | 0/3                       |
| Bladder                                      | 0/5                                                             | 0/5                                             | 0/3                       |
| Joint                                        | 0/5                                                             | 0/5                                             | 0/3                       |
| Total infected mice<br>(day 28) <sup>c</sup> | 0/5                                                             | 0/5                                             | 0/3                       |

32 <sup>a</sup> ha denotes host-adapted clone.

33 <sup>b</sup> Values listed correspond to numbers of cultures positive/numbers tested.

34 <sup>c</sup> Based on combined results obtained from culturing ear, heart, bladder and tibiotarsal joint.

35
